# Supplementary material
Source: PubMed Central journal article supplement (PMC3732952)
Supplement: 1300064110_pnas.201300064SI.pdf [file 1300064110_pnas.201300064SI.pdf]

# Supporting Information

Mao et al. 10.1073/pnas.1300064110

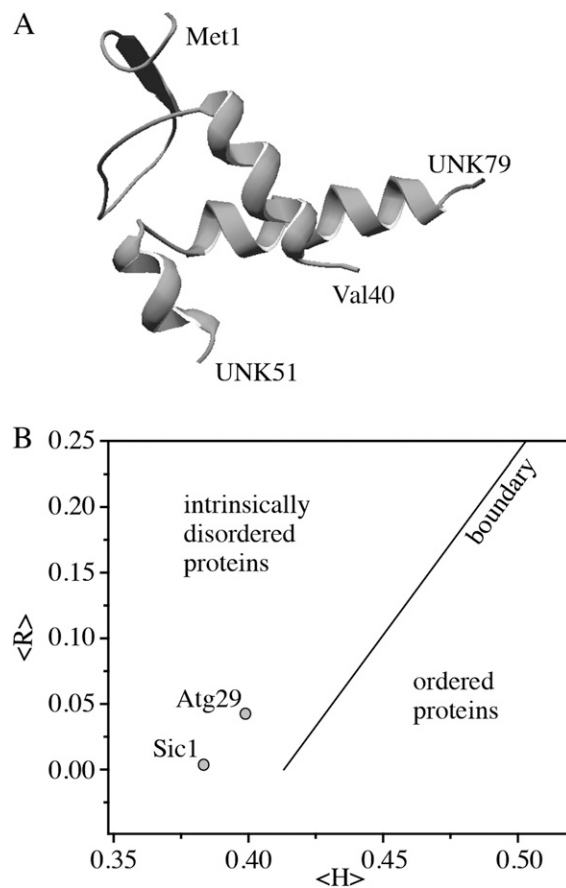

**Fig. S1.** AuTophagy-related (Atg29) is an intrinsically disordered protein (IDP). (A) Ribbon model of Atg29 [Protein Data Bank (PDB) ID code 4HPQ]. End residues on secondary structure elements are labeled. UNK, unknown. (B) Charge-hydrophobicity (CH) plot shows the mean net charge  $\langle R \rangle$  as a function of the mean hydrophobicity  $\langle H \rangle$ . Solid line marks the boundary that separates ordered (globular) proteins from intrinsically disordered proteins. Plot shows the position of Atg29 relative to the boundary and the position of the recently characterized IDP Sic1 from *Saccharomyces cerevisiae* (1).

1. Brocca S, et al. (2009) Order propensity of an intrinsically disordered protein, the cyclin-dependent-kinase inhibitor Sic1. *Proteins* 76(3):731–746.

**Table S1. Strains used in this study**

| Name    | Genotype                                                                                                                                  | Reference  |
|---------|-------------------------------------------------------------------------------------------------------------------------------------------|------------|
| HCY107  | YCY123 <i>ATG17-GFP::HIS3</i>                                                                                                             | This study |
| HCY108  | YCY131 <i>ATG17-GFP::HIS3</i>                                                                                                             | This study |
| HCY109  | SEY6210 <i>atg29Δ::KAN</i>                                                                                                                | This study |
| HCY125  | SEY6210 <i>atg17Δ::KAN Atg29-PA::TRP1</i>                                                                                                 | This study |
| HCY129  | SEY6210 <i>Atg29-PA::TRP1</i>                                                                                                             | This study |
| KDM1233 | SEY6210 <i>atg29Δ::KAN ATG31-GFP::HIS3</i>                                                                                                | This study |
| KDM1234 | SEY6210 <i>ATG17-PA::HIS3</i>                                                                                                             | This study |
| KDM1235 | SEY6210 <i>atg29Δ::KAN ATG17-PA::HIS3</i>                                                                                                 | This study |
| KDM1270 | SEY6210 <i>atg1Δ::HIS5 atg11Δ::LEU2</i>                                                                                                   | This study |
| KDM1406 | TN124 <i>atg11Δ::URA3</i>                                                                                                                 | This study |
| KDM1407 | TN124 <i>atg29Δ::KAN atg11Δ::URA3</i>                                                                                                     | This study |
| KDM1408 | SEY6210 <i>pho13Δ pho8Δ60 atg1Δ::LEU2</i>                                                                                                 | This study |
| KDM1409 | SEY6210 <i>pho13Δ pho8Δ60 atg29Δ::HIS5</i>                                                                                                | This study |
| KDM1410 | SEY6210 <i>pho13Δ pho8Δ60 atg1Δ::LEU2 atg29Δ::HIS5</i>                                                                                    | This study |
| KDM1551 | SEY6210 <i>pRPL7b-VC-ATG11::HIS3 ATG17-VN::TRP1</i>                                                                                       | This study |
| KDM1552 | SEY6210 <i>pRPL7b-VC-ATG11::HIS3 ATG29-VN::TRP1</i>                                                                                       | This study |
| KDM1553 | SEY6210 <i>pRPL7b-VC-ATG11::HIS3 ATG31-VN::TRP1</i>                                                                                       | This study |
| SEY6210 | <i>MATα leu2-3,112 ura3-52 his3-Δ200 trp1-Δ901 suc2-Δ9 lys2-801 GAL</i>                                                                   | (1)        |
| TKY12   | SEY6210 <i>atg29Δ::KAN atg1Δ::LEU2</i>                                                                                                    | This study |
| TN124   | <i>MATα leu2-3,112 trp1 ura3-52 pho8::pho8Δ60 pho13Δ::LEU2</i>                                                                            | (2)        |
| WHY1    | SEY6210 <i>atg1Δ::HIS5</i>                                                                                                                | This study |
| WLY176  | SEY6210 <i>pho13Δ pho8Δ60</i>                                                                                                             | This study |
| YCY123  | SEY6210 <i>atg1Δ, 2Δ, 3Δ, 4Δ, 5Δ, 6Δ, 7Δ, 8Δ, 9Δ, 10Δ, 11Δ, 12Δ, 13Δ, 14Δ, 16Δ, 17Δ, 18Δ, 19Δ, 20Δ, 21Δ, 23Δ, 24Δ, 27Δ, 29Δ</i>           | (3)        |
| YCY131  | SEY6210 <i>atg1Δ, 2Δ, 3Δ, 4Δ, 5Δ, 6Δ, 7Δ, 8Δ, 9Δ, 10Δ, 11Δ, 12Δ, 13Δ, 14Δ, 16Δ, 17Δ, 18Δ, 19Δ, 20Δ, 21Δ, 23Δ, 24Δ, 27Δ, 29Δ, 31Δ::ble</i> | This study |
| YIY36   | TN124 <i>atg29Δ::KAN</i>                                                                                                                  | This study |

- Robinson JS, Klionsky DJ, Banta LM, Emr SD (1988) Protein sorting in *Saccharomyces cerevisiae*: Isolation of mutants defective in the delivery and processing of multiple vacuolar hydrolases. *Mol Cell Biol* 8(11):4936–4948.
- Noda T, Matsuura A, Wada Y, Ohsumi Y (1995) Novel system for monitoring autophagy in the yeast *Saccharomyces cerevisiae*. *Biochem Biophys Res Commun* 210(1):126–132.
- Cao Y, Cheong H, Song H, Klionsky DJ (2008) In vivo reconstitution of autophagy in *Saccharomyces cerevisiae*. *J Cell Biol* 182(4):703–713.
